# Supplementary material for: Overexpression of the X-Linked Inhibitor of Apoptosis Protein (XIAP) in Neurons Improves Cell Survival and the Functional Outcome after Traumatic Spinal Cord Injury
Source: MDPI journal article supplement (doi:10.3390/ijms24032791), 2023-02-01
Supplement: s1 [file s1]

**Supplementary Table S1**

| Cell Line                                       | Reference                                               |
|-------------------------------------------------|---------------------------------------------------------|
| SH-SY5Y human neuroblastoma                     | ATCC Cat#CRL-2266<br>RRID:CVCL_0019                     |
| Immunoblot Primary Antibodies                   | Reference                                               |
| $\alpha$ -c-Myc                                 | Roche Cat#11667149001<br>RRID:AB_390912                 |
| $\alpha$ -hXIAP                                 | BD Biosciences cat#610717<br>RRID: AB_398040            |
| $\alpha$ -Caspase3                              | Cell Signaling Technology cat#9662,<br>RRID: AB_331439  |
| $\alpha$ -Caspase 7                             | Cell Signaling Technology cat#9492,<br>RRID: AB_2228313 |
| $\alpha$ -Poly (ADP-Ribose) Polymerase (PARP)   | Cell Signaling Technology cat#9542,<br>RRID: AB_2160739 |
| $\alpha$ - $\beta$ -Actin                       | BD Biosciences cat#612656<br>RRID: AB_2289199           |
| $\alpha$ - $\beta$ -Tubulin                     | Sigma-Aldrich Cat# T5293,<br>RRID:AB_477580             |
| Immunoblot Secondary Antibodies                 | Reference                                               |
| HRP-conjugated goat $\alpha$ -Rabbit            | ThermoFisher Scientific cat#31460;<br>RRID: AB_228341   |
| HRP-conjugated goat $\alpha$ -Mouse             | ThermoFisher Scientific cat#31430;<br>RRID: AB_228307   |
| Immufluorescence Antibodies                     | Reference                                               |
| Rabbit- $\alpha$ -NeuN                          | ThermoFisher Scientific cat#ABN78;<br>RRID: AB_10807945 |
| Alexafluor 488-conjugated goat $\alpha$ -Rabbit | Abcam, cat#150081;<br>RRID: AB_2734747                  |
| PCR primers                                     | Sequence                                                |
| hXIAP Primer forward                            | 5'-CCCAAATTCAACAAACCG-3'                                |
| hXIAP Primer reverse                            | 5'-CTGAACTGAGTAGGACGT-3'                                |
